# Supplementary material for: Prion propagation can occur in a prokaryote and requires the ClpB chaperone
Source: eLife journal article supplement (doi:10.7554/elife.02949), 2014-08-13
Supplement: supp [file elife-02949-supp-v1.zip]

Supplementary file 1

| <b>Strains<br/>(<i>Escherichia coli</i>)</b>                                              | <b>Alias</b> | <b>Genotype</b>                                                                                                                                                                                                                                                                                | <b>Source and Comments</b>                                                                                                              |
|-------------------------------------------------------------------------------------------|--------------|------------------------------------------------------------------------------------------------------------------------------------------------------------------------------------------------------------------------------------------------------------------------------------------------|-----------------------------------------------------------------------------------------------------------------------------------------|
| DH5 $\alpha$ Z1                                                                           | AY75         | <i>attB</i> ( $\lambda$ ):: <i>lacI</i> <sup>f</sup> -P <sub>N25</sub> - <i>tetR</i> :: <i>aadA endA1</i><br><i>hsdR17</i> (rK-mK+) <i>glnV44</i><br><i>thi-1 recA1 gyrA96 relA1</i><br>$\Delta$ ( <i>lacIZYA-argF</i> )169 <i>deoR</i><br><i>attB</i> ( $\phi$ 80):: <i>lacZ</i> $\Delta$ M15 | Lutz and Bujard, 1997; Spec <sup>R</sup>                                                                                                |
| DH5 $\alpha$ Z1 $\Delta$ <i>clpB</i>                                                      | AY153        | DH5 $\alpha$ Z1 $\Delta$ <i>clpB</i> :: <i>kan</i>                                                                                                                                                                                                                                             | This study; Spec <sup>R</sup> and Kan <sup>R</sup>                                                                                      |
| PIR2 F' P <sub>tac</sub> - <i>tetR</i>                                                    | AY290        | $\Delta$ <i>lac169 rpoS</i> (am) <i>robA1</i><br><i>creC510 hsdR514 endA</i><br><i>recA1 uidA</i> ( $\Delta$ MluI):: <i>pir</i> F'<br>P <sub>tac</sub> - <i>tetR-lacZYA</i> <sup>f</sup> :: <i>tetRA</i>                                                                                       | This study; Tet <sup>R</sup>                                                                                                            |
| DH5 $\alpha$ Z1 $\Delta$ <i>clpB</i>                                                      | AY295        | DH5 $\alpha$ Z1 $\Delta$ <i>clpB</i> :: <i>FRT</i>                                                                                                                                                                                                                                             | This study                                                                                                                              |
| DH5 $\alpha$ Z1 $\Delta$ <i>clpB</i><br>P <sub>LtetO-1</sub> - <i>clpB</i>                | AY321        | DH5 $\alpha$ Z1 $\Delta$ <i>clpB</i> :: <i>FRT</i><br><i>attB</i> (HK022)::P <sub>LtetO-1</sub> - <i>clpB</i> -<br><i>t<sub>L3</sub></i> :: <i>kan</i>                                                                                                                                         | This study; Spec <sup>R</sup> and Kan <sup>R</sup>                                                                                      |
| DH5 $\alpha$ Z1 $\Delta$ <i>clpB</i><br>P <sub>LtetO-1</sub> - <i>clpB</i> Y653A          | AY322        | DH5 $\alpha$ Z1 $\Delta$ <i>clpB</i> :: <i>FRT</i><br><i>attB</i> (HK022)::P <sub>LtetO-1</sub> - <i>clpB</i><br>Y653A- <i>t<sub>L3</sub></i> :: <i>kan</i>                                                                                                                                    | This study; Spec <sup>R</sup> and Kan <sup>R</sup>                                                                                      |
| DH5 $\alpha$ Z1 $\Delta$ <i>clpB</i><br>P <sub>LtetO-1</sub> - <i>clpB</i><br>E279A/E678A | AY323        | DH5 $\alpha$ Z1 $\Delta$ <i>clpB</i> :: <i>FRT</i><br><i>attB</i> (HK022)::P <sub>LtetO-1</sub> - <i>clpB</i><br>E279A/E678A- <i>t<sub>L3</sub></i> :: <i>kan</i>                                                                                                                              | This study; Spec <sup>R</sup> and Kan <sup>R</sup>                                                                                      |
| DH5 $\alpha$ Z1 $\Delta$ <i>clpB</i><br>P <sub>LtetO-1</sub> - <i>clpB</i> E432A          | AY324        | DH5 $\alpha$ Z1 $\Delta$ <i>clpB</i> :: <i>FRT</i><br><i>attB</i> (HK022)::P <sub>LtetO-1</sub> - <i>clpB</i><br>E432A- <i>t<sub>L3</sub></i> :: <i>kan</i>                                                                                                                                    | This study; Spec <sup>R</sup> and Kan <sup>R</sup>                                                                                      |
| DH5 $\alpha$ Z1 $\Delta$ <i>clpB</i> P <sub>LtetO-1</sub>                                 | AY325        | DH5 $\alpha$ Z1 $\Delta$ <i>clpB</i> :: <i>FRT</i><br><i>attB</i> (HK022)::P <sub>LtetO-1</sub> - <i>t<sub>L3</sub></i> :: <i>kan</i>                                                                                                                                                          | This study; Spec <sup>R</sup> and Kan <sup>R</sup>                                                                                      |
| <b>Strains<br/>(<i>Saccharomyces cerevisiae</i>)</b>                                      | <b>Alias</b> | <b>Genotype</b>                                                                                                                                                                                                                                                                                | <b>Source and Comments</b>                                                                                                              |
| YJW187 [ <i>pin</i> ] [ <i>psi</i> ]                                                      | SG775        | 74D-694 MATa <i>ade1-14</i> (UGA) <i>his3 leu2 trp1</i><br><i>ura3</i> [ <i>pin</i> ] [ <i>psi</i> ]                                                                                                                                                                                           | Garrity et al., 2010; obtained by serial passage on YPD agar supplemented with 3 mM GuHCl; phenotypically [ <i>pin</i> ] [ <i>psi</i> ] |
| YJW187 [ <i>PSI</i> <sup>f</sup> ]                                                        | SG862        | 74D-694 MATa <i>ade1-14</i> (UGA) <i>his3 leu2 trp1</i><br><i>ura3</i> [ <i>PSI</i> <sup>f</sup> ]                                                                                                                                                                                             | Garrity et al., 2010; phenotypically strong [ <i>PSI</i> <sup>f</sup> ]                                                                 |
| YJW187 [ <i>PSI</i> <sup>f</sup> ]                                                        | SG863        | 74D-694 MATa <i>ade1-14</i> (UGA) <i>his3 leu2 trp1</i><br><i>ura3</i> [ <i>PSI</i> <sup>f</sup> ]                                                                                                                                                                                             | Garrity et al., 2010; phenotypically weak [ <i>PSI</i> <sup>f</sup> ]                                                                   |
| <b>Plasmids</b>                                                                           | <b>Alias</b> | <b>Features</b>                                                                                                                                                                                                                                                                                | <b>Source and Comments</b>                                                                                                              |
| pBR322-SUP35 NM                                                                           | pAY45        | <i>bla</i> P <sub>tac</sub> -SUP35 NM- <i>mCherry-his<sub>6x</sub>-t<sub>T7</sub></i> pMB1 <i>ori</i>                                                                                                                                                                                          | This study; produces Sup35 NM (Sup35 residues 1-253) fused to                                                                           |

Supplementary file 1

|                                                      |        |                                                                                             |                                                                                                                                                                                            |
|------------------------------------------------------|--------|---------------------------------------------------------------------------------------------|--------------------------------------------------------------------------------------------------------------------------------------------------------------------------------------------|
|                                                      |        |                                                                                             | mCherry2 and a hexahistidine tag under the control of the tac promoter; Amp <sup>R</sup>                                                                                                   |
| pSC101 <sup>TS</sup>                                 | pAY50  | <i>cat P<sub>tac-tL3</sub> repA<sup>TS</sup> pSC101 ori</i>                                 | This study; derived from pMAK700 (Hamilton et al., 1989); Cam <sup>R</sup>                                                                                                                 |
| pSC101 <sup>TS</sup> - <i>NEW1</i>                   | pAY48  | <i>cat P<sub>tac</sub>-NEW1-mGFP-tL3 repA<sup>TS</sup> pSC101 ori</i>                       | This study; produces residues 50-100 of New1 fused to mGFP <sub>mut3</sub> under the control of the tac promoter; Cam <sup>R</sup>                                                         |
| pSC101 <sup>TS</sup> - <i>NEW1-clpB</i>              | pAY71  | <i>cat P<sub>tac</sub>-NEW1-mGFP-tL3-P<sub>clpB</sub>-clpB repA<sup>TS</sup> pSC101 ori</i> | This study; produces residues 50-100 of New1 fused to mGFP <sub>mut3</sub> under the control of the tac promoter; produces ClpB under the control of its native promoter; Cam <sup>R</sup> |
| pSC101 <sup>TS</sup> - <i>recA</i>                   | pAY69  | <i>cat P<sub>tac-recA-tL3</sub> repA<sup>TS</sup> pSC101 ori</i>                            | This study; produces RecA under the control of the tac promoter; Cam <sup>R</sup>                                                                                                          |
| pAH70-P <sub>LtetO-I</sub>                           | pAY152 | <i>kan P<sub>LtetO-I-tL3</sub> attP(HK022) γR6K ori</i>                                     | This study; derived from pAH70 (Haldimann and Wanner, 2001); harbors the P <sub>LtetO-I</sub> promoter(Lutz and Bujard, 1997); Kan <sup>R</sup>                                            |
| pAH70-P <sub>LtetO-I</sub> - <i>clpB</i>             | pAY154 | <i>kan P<sub>LtetO-I-clpB-tL3</sub> attP(HK022) γR6K ori</i>                                | This study; produces wild-type ClpB under the control of the P <sub>LtetO-I</sub> promoter; Kan <sup>R</sup>                                                                               |
| pAH70-P <sub>LtetO-I</sub> - <i>clpB</i> Y653A       | pAY155 | <i>kan P<sub>LtetO-I-clpB</sub> Y653A-tL3 attP(HK022) γR6K ori</i>                          | This study; produces ClpB Y653A under the control of the P <sub>LtetO-I</sub> promoter; Kan <sup>R</sup>                                                                                   |
| pAH70-P <sub>LtetO-I</sub> - <i>clpB</i> E279A/E678A | pAY156 | <i>kan P<sub>LtetO-I-clpB</sub> E279A/E678A-tL3 attP(HK022) γR6K ori</i>                    | This study; produces ClpB E279A/E678A under the control of the P <sub>LtetO-I</sub> promoter; Kan <sup>R</sup>                                                                             |
| pAH70-P <sub>LtetO-I</sub> - <i>clpB</i> E432A       | pAY157 | <i>kan P<sub>LtetO-I-clpB</sub> E432A-tL3 attP(HK022) γR6K ori</i>                          | This study; produces ClpB E432A under the control of the P <sub>LtetO-I</sub> promoter; Kan <sup>R</sup>                                                                                   |
| pAH69                                                | N/A    | <i>bla λP<sub>R-int</sub>HK022 λ.cl857 repA<sup>TS</sup> R101 ori</i>                       | Haldimann and Wanner, 2001; produced HK022 Int under the control of the λP <sub>R</sub> promoter; Amp <sup>R</sup>                                                                         |
| pCP20                                                | N/A    | <i>bla cat λP<sub>R-flp</sub> λ.cl857 repA<sup>TS</sup> p15A ori</i>                        | Cherepanov and Wackernagel, 1995; produced Flp recombinase under the control of the λP <sub>R</sub> promoter; Amp <sup>R</sup> and Cam <sup>R</sup>                                        |
| pRS316                                               | N/A    | <i>URA3 bla CEN6 pMB1 ori</i>                                                               | Sikorski and Hieter, 1989; <i>URA3</i> shuttle vector                                                                                                                                      |
